# Supplementary material
Source: publisher figshare collection journal article supplement (https://karger.figshare.com/ndownloader/files/16187861)
Supplement: Supplementary file 1 [file 16187861]

Supplementary Table 1. Basal characteristics of the patients and therapy during acute exacerbation

| Characteristics | Pulmonology outpatient clinic *  (n=24) | Hospital discharge*  (n=43) | P-value |
| --- | --- | --- | --- |
| MRC score ≥ 3 | 5 (20.8) | 13 (30.2) | 0.41 |
| Respiratory colonization due to *P. aeruginosa* | 16 (66.7) | 25 (58.1) | 0.49 |
| Median number of exacerbations in the previous year (IQR) | 3 (0,4) | 3 (0,25.4) | 0.55 |
| Median number of admissions in the previous year (IQR) | 0 (0,1) | 1 (0,2) | 0.14 | |
| **Maintenance treatments** |  |  |  | |
| Bronchodilators | 14 (58.3) | 27 (62.8) | 0.72 |
| Inhaled steroids | 14 (58.3) | 12 (27.9) | 0.01 |
| Oral steroids | 5 (20.8) | 7 (16.3) | 0.64 |
| Chronic azithromycin | 13 (54.2) | 17 (39.5) | 0.25 |
| Inhaled antibiotic therapy | 14 (58.3) | 20 (46.5) | 0.35 |
| Non-invasive mechanical ventilation at home | 1 (4.2) | 7 (16.3) | 0.24 |
| Home oxygen | 7 (29.2) | 16 (37.2) | 0.51 |
| Pulmonary rehabilitation programme | 5 (20.8) | 9 (20.9) | 0.99 |

MRC score: Medical research council breathlessness scale. (*): Data expressed as absolute (relative) frequencies or median (inter-quartile range), depending on the nature of the variable.

Supplementary Table 2. Cost associated to conventional hospitalization versus outpatient parenteral antimicrobial therapy (OPAT)

|  | Conventional hospitalization | OPAT |
| --- | --- | --- |
| **Day of admission** |  | 74 €/patient/day |
| Pneumology ward | 1,150 €/day | -- |
| Infectious diseases ward | 809 €/day | -- |
| Internal Medicine ward | 411 €/day | -- |
| **Type of activity** |  |  |
| Nurse team | -- | 116,089 €/year |
| Fungible | -- | 3,700 €/year |
| Antimicrobials | -- | 143,278 €/year |
| Vehicle | -- | 3,725 €/year |
| Fuel | -- | 5,226 €/year |
| Total |  | 272,018 €/year |
